# Supplementary material for: Myoglobin Interaction with Lactate Rapidly Releases Oxygen: Studies on Binding Thermodynamics, Spectroscopy, and Oxygen Kinetics
Source: MDPI journal article supplement (doi:10.3390/ijms23094747), 2022-04-26
Supplement: s1 [file s1]

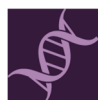

Article

# Myoglobin Interaction with Lactate Rapidly Releases Oxygen: Studies on Binding Thermodynamics, Spectroscopic and Oxygen Kinetics

Kiran Kumar Adepu <sup>1,2,\*</sup>, Dipendra Bhandari <sup>1</sup>, Andriy Anishkin <sup>3</sup>, Sean H. Adams <sup>4,5</sup> and Sree V. Chintapalli <sup>1,2,\*</sup>

<sup>1</sup> Arkansas Children's Nutrition Center, Little Rock, AR 72202, USA; bhandarid@archildrens.org

<sup>2</sup> Department of Pediatrics, University of Arkansas for Medical Sciences, Little Rock, AR 72202, USA

<sup>3</sup> Department of Biology, University of Maryland, College Park, MD 20742, USA; anisan@gmail.com

<sup>4</sup> Department of Surgery, School of Medicine, University of California, Davis, CA 95616, USA; shadams@ucdavis.edu

<sup>5</sup> Center for Alimentary and Metabolic Science, University of California, Davis, CA 95616, USA

\* Correspondence: kkadepu@uams.edu (K.K.A.); svchintapalli@uams.edu (S.V.C.)

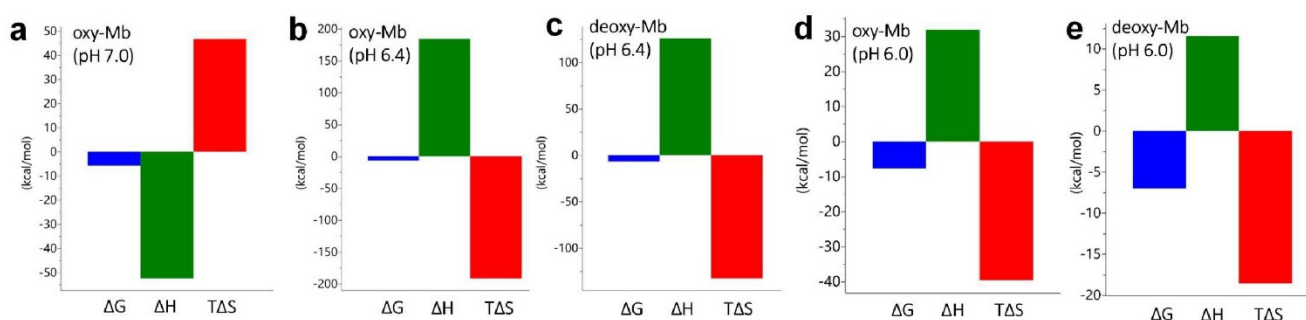

**Supplementary Figure S1.** A representative ITC signature plot of oxy-Mb bound lactate at pH 7.0 (deoxy-Mb did not bind LAC at pH 7.0) (a), oxy-Mb bound LAC (b) and deoxy-Mb bound LAC (c) at pH 6.4, oxy-Mb bound LAC (d) and deoxy-Mb bound LAC (e) at pH 6.0.

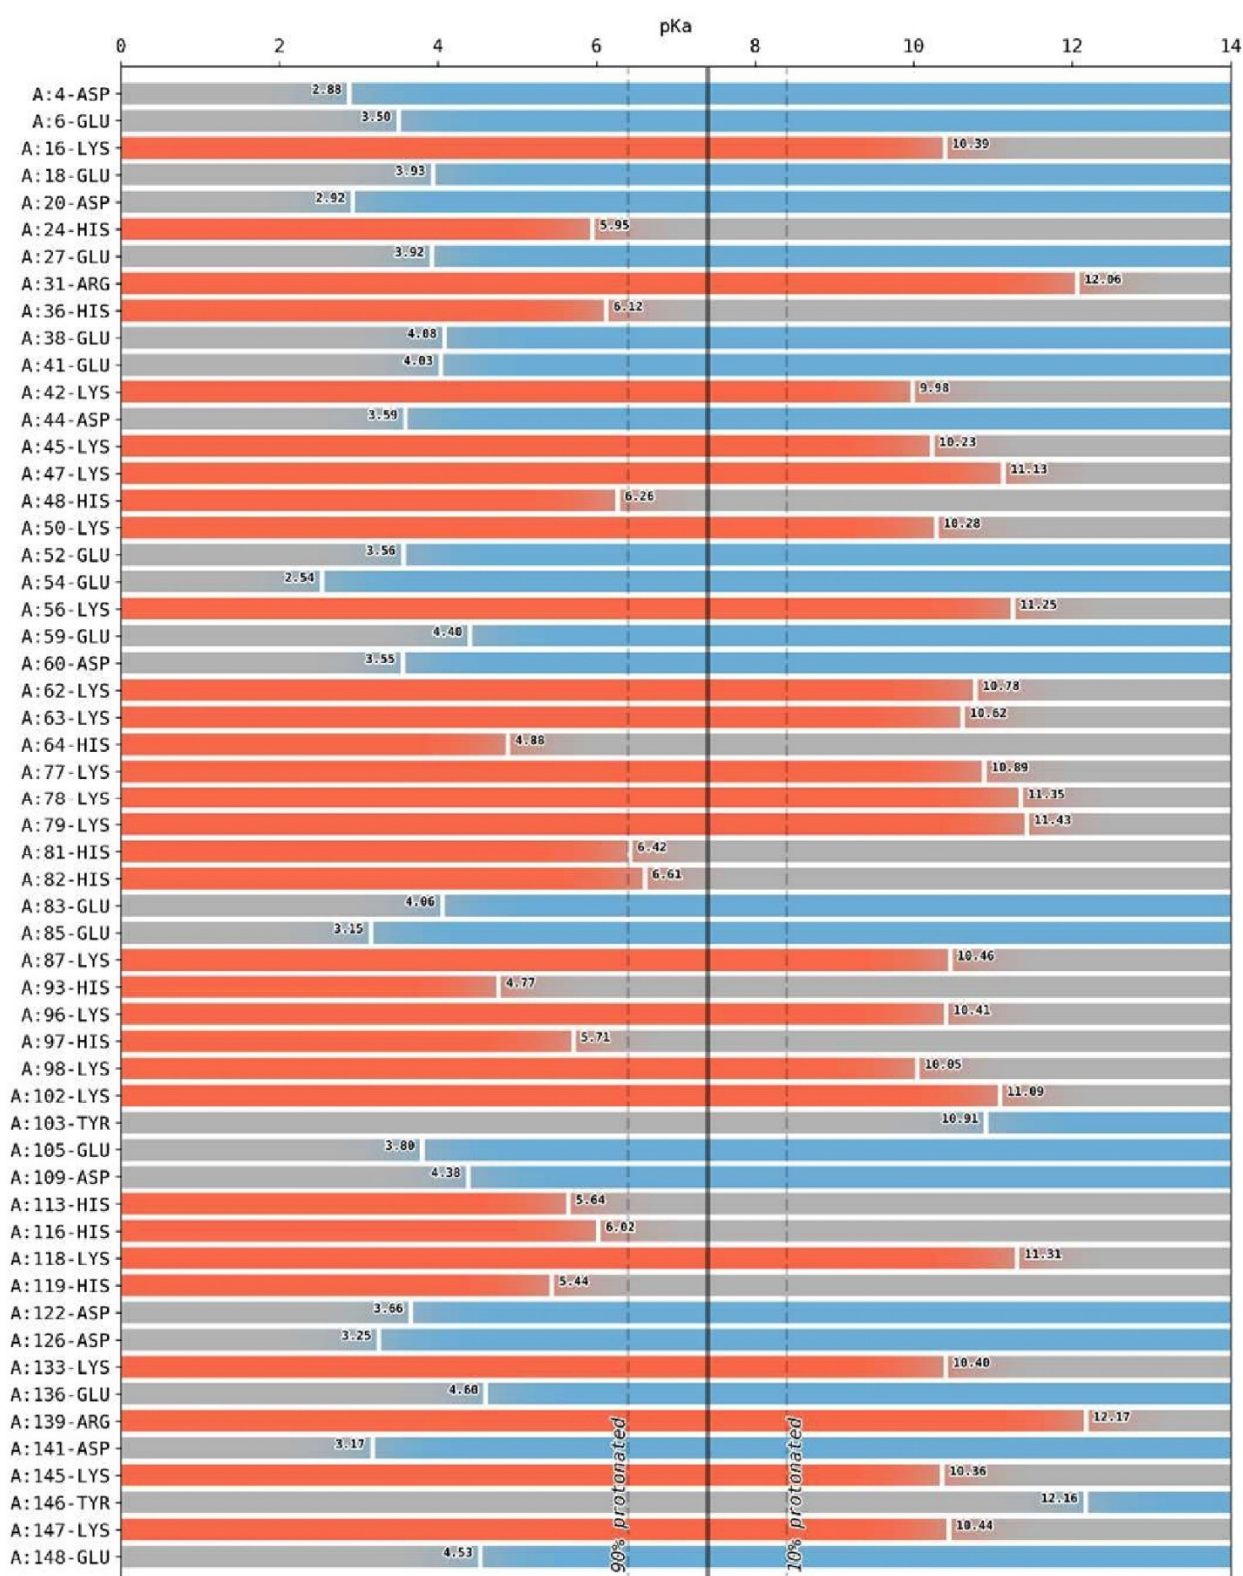

**Supplementary Figure S2:** Different pKa values of residues of horse heart muscle Mb (PDB ID: 2V1K) determined by PROPKA.

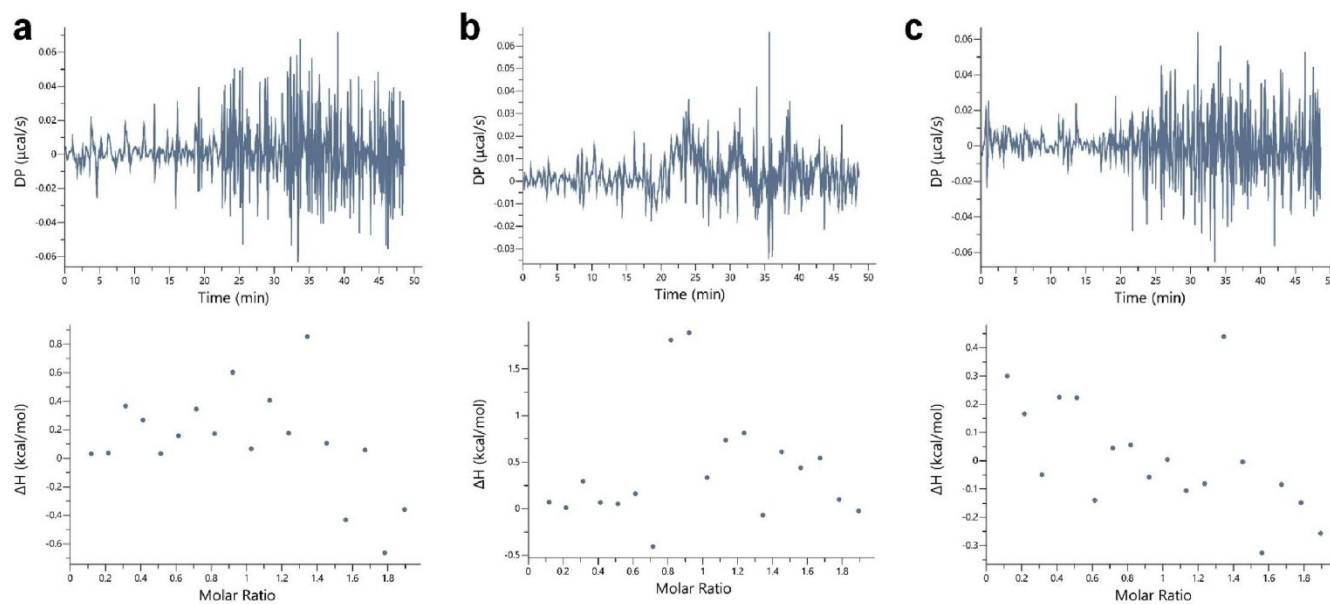

**Supplementary Figure S3.** Representative ITC plots of binding interactions of LAC with lysozyme at (a) pH 7.0, (b) pH 6.4 and (c) pH 6.0. LAC did not bound to lysozyme in all the test pH buffers. Thus, lysozyme was treated as a negative control protein in all the ITC binding studies.
